1 Synergistic Activity of Minocycline and Rifampin in Combination with Antifungal Drugs against

2 *Candida auris*

3

4 Thea Brennan-Krohn,<sup>a,b,c</sup># Liam Friar,<sup>a\*</sup> Sarah Ditelberg,<sup>a</sup> James E. Kirby<sup>a,c</sup>

5

6 <sup>a</sup>Department of Pathology, Beth Israel Deaconess Medical Center, Boston, Massachusetts, USA

7 <sup>b</sup>Division of Infectious Diseases, Boston Children's Hospital, Boston, Massachusetts, USA

8 <sup>c</sup>Harvard Medical School, Boston, Massachusetts, USA

9

10 Running Title: Antibacterial-antifungal synergy for *Candida auris*

11

12 #Address correspondence to Thea Brennan-Krohn, [tkrohn@bidmc.harvard.edu](mailto:tkrohn@bidmc.harvard.edu)

13 \*Present address: Liam Friar, University of Colorado Boulder, Boulder, Colorado, USA

14

15 ABSTRACT

16 *Candida auris* is an emerging multidrug-resistant fungal pathogen that spreads readily in  
17 healthcare settings and has caused numerous hospital outbreaks. Very few treatment options  
18 exist for *C. auris* infections. We evaluated the activity of all two-drug combinations of three  
19 antifungal agents (amphotericin B, caspofungin, and voriconazole) and two antibacterial agents  
20 (minocycline and rifampin) against a collection of 10 *C. auris* isolates using an automated, inkjet  
21 printer-assisted checkerboard array method. Three antibacterial-antifungal combinations  
22 (amphotericin B plus rifampin, amphotericin B plus minocycline, and caspofungin plus  
23 minocycline) demonstrated synergistic activity by checkerboard array against  $\geq 90\%$  of strains.  
24 The two amphotericin B-containing combinations were also synergistic using the time-kill  
25 synergy testing method. Our results suggest that combinations of antifungal and antibacterial  
26 agents may provide a promising avenue for treatment of this multidrug-resistant pathogen.

27

## 28 INTRODUCTION

29           The pathogenic yeast *Candida auris*, first identified in the external ear canal drainage of  
30 a woman in Japan in 2009 (1), was classified by the U.S. Centers for Disease Control and  
31 Prevention as one of the most urgent antibiotic resistance threats in 2019 (2). At least 4 distinct  
32 clades of the yeast appear to have emerged nearly simultaneously on 3 different continents  
33 around the time the first isolate was recognized (3). More recently, invasive *C. auris* infections  
34 have been observed as a complication of critical SARS-CoV-2 disease (4–6). *C. auris* is most  
35 commonly reported as a cause of bloodstream infections; patients with central venous  
36 catheters and recent surgical procedures appear to be at particularly high risk (7). Compared to  
37 other *Candida* species, *C. auris* is notable for its propensity to spread rapidly within healthcare  
38 settings, for a high rate of mortality in infected patients, and for frequent resistance to multiple  
39 antifungal drugs (8, 9).

40           The number of drugs available to treat even the most susceptible of fungal pathogens is  
41 small, with only three classes of systemic antifungal agents in general use: azoles,  
42 echinocandins, and the polyene amphotericin B (AMB) (10). Individual patient factors, such as  
43 allergies, vulnerabilities to side effects, drug-drug interactions, and the need for penetration  
44 into specific tissue sites frequently further constrain the choice of agents that can be safely and  
45 effectively used; resistance to any of these agents may reduce practical treatment options to  
46 few or none. In this context, the resistance profiles observed among *C. auris* isolates are  
47 particularly alarming: nearly all isolates are resistant to fluconazole, and some also demonstrate  
48 resistance to echinocandins and AMB (7, 11). Isolates resistant to drugs from all three classes  
49 have been reported (12).

50           Unfortunately, the antifungal drug pipeline is unlikely to yield an abundance of new  
51 treatment options in the near future. Antifungal drug development is hampered by intrinsic  
52 challenges (fungi, like humans, are eukaryotic organisms, and therefore it is difficult to identify  
53 compounds that are active against fungal pathogens but not highly toxic to host cells) and by  
54 poor financial incentives for pharmaceutical companies (10). Ibrexafungerp, a first-in-class  
55 glucan synthase inhibitor, has recently been shown to have activity against *C. auris* (13) in *in*  
56 *vitro* and animal models (14), but has not yet been approved for clinical use.

57           One treatment approach that does not rely on the introduction of novel agents is the  
58 repurposing of existing drugs in combination. Combination therapy using two or more  
59 antifungal drugs is already an established component of therapy for certain fungal infections:  
60 AMB is routinely used in combination with 5-fluorocytosine as induction therapy for  
61 *Cryptococcus neoformans* meningitis (15), while combinations of antifungal drugs are often  
62 employed in an attempt to treat infections caused by highly drug-resistant molds such as  
63 *Scedosporium* spp. (16). This strategy, however, still relies on the limited number of currently  
64 available antifungal agents.

65           In 1972, investigators observed *in vitro* synergistic activity in *Saccharomyces cerevisiae*  
66 when AMB was combined with rifampin (RIF), an antibacterial RNA synthesis inhibitor (17) or  
67 with tetracycline, an antibacterial protein synthesis inhibitor (18); the combination of AMB with  
68 RIF was later also noted to be synergistic against several *Candida* species (19). Synergy between  
69 AMB and the tetracycline analogue minocycline (MIN) was demonstrated against *Cryptococcus*  
70 *neoformans*, *C. albicans*, and other *Candida* species in 1977 (20). Fluconazole was also  
71 subsequently reported to be synergistic with MIN and with another tetracycline analogue,

72 doxycycline, against *C. albicans* (21, 22). To our knowledge, however, these antibacterial-  
73 antifungal combinations have not been evaluated in *C. auris*. We used a novel inkjet printer-  
74 assisted checkerboard array synergy method as well as time-kill synergy studies to investigate  
75 synergistic activity of combinations of MIN, RIF, voriconazole (VRC; an azole antifungal),  
76 caspofungin (CAS; an echinocandin), and AMB against a collection of *C. auris* isolates with a  
77 range of drug resistance patterns.

78

## 79 RESULTS

### 80 **Single drug MIC testing by broth microdilution (BMD) and digital dispensing method (DDM).**

81 BMD MICs were prepared in triplicate to determine the modal MIC (i.e. the MIC obtained in  $\geq 2$   
82 replicates) at 24 hours (all drugs) and 48 hours (VRC and AMB) using standard Clinical and  
83 Laboratory Standards Institute (CLSI) methodology (23). If three sequential doubling dilution  
84 values were obtained in the three replicates (e.g. 2, 4, and 8  $\mu\text{g}/\text{mL}$ ), the middle value was  
85 considered the modal MIC. Modal MICs ranged from 0.5 to 2  $\mu\text{g}/\text{mL}$  for AMB, from  $\leq 0.016$  to  $> 8$   
86  $\mu\text{g}/\text{mL}$  for VRC, and from 0.063-0.5  $\mu\text{g}/\text{mL}$  for CAS. VRC MICs were higher at 48 than 24 hours,  
87 while AMB MICs were either the same or one doubling dilution higher at 48 hours compared to  
88 24 hours for all strains. Neither RIF nor MIN exhibited inhibitory activity at the concentrations  
89 tested (Table 1 and Table S1).

90

91 For each condition (i.e., each drug tested against each strain at 24 or 48 hours), five DDM MIC  
92 values were also obtained: a dedicated MIC test result and four results from the single-drug  
93 titrations of each synergy grid in the checkerboard array testing described below (Table S1).

94 When on-scale DDM MIC results were compared to on-scale modal BMD MICs, 94.7% were  
95 within  $\pm 1$  doubling dilution and 99.5% were within  $\pm 2$  doubling dilutions of the modal MIC  
96 (Table 2). In antifungal susceptibility testing, essential agreement between a new method and  
97 the reference method is generally defined as an MIC value falling within  $\pm 2$  doubling dilutions of  
98 the reference result (24, 25). Concordance with the modal BMD MIC was highest for AMB  
99 (100% of on-scale results within  $\pm 1$  doubling dilution) and lowest for CAS (81.6% and 98.0% of  
100 on-scale results within  $\pm 1$  and  $\pm 2$  doubling dilutions, respectively). Therefore, our data indicate  
101 that the DDM automation method provides accurate and robust antifungal testing results.

102

103 **Checkerboard array synergy testing using DDM.** Using the checkerboard array assay, we found  
104 that MIN was synergistic against all 10 strains when combined with either AMB or CAS, and RIF  
105 was synergistic with AMB against 9 strains. In synergistic combinations, the concentration of  
106 MIN at the  $FIC_{I-MIN}$  ranged from 4-16  $\mu\text{g}/\text{mL}$  and was  $\leq 8$   $\mu\text{g}/\text{mL}$  in 12 of 22 cases, while the  
107 concentration of RIF was 8  $\mu\text{g}/\text{mL}$  in 5 cases and 16  $\mu\text{g}/\text{mL}$  in 4 cases. All other combinations  
108 were synergistic against  $\leq 2$  strains. Three of the 5 combinations that were not synergistic  
109 against any strains were antagonistic against 2 strains. (Table 3 and Table S2).

110

111 **Time-kill synergy testing.** The three combinations that demonstrated synergy against  $\geq 9$  strains  
112 by the checkerboard array assay (MIN plus AMB, MIN plus CAS, and RIF plus AMB) were tested  
113 using the time-kill method against a subset of 5 of the *C. auris* strains, which were chosen to  
114 represent a range of susceptibility profiles. (Table 4, Figure 1). Each drug pair was tested, at two  
115 combinations of concentrations of individual drugs, against each of the 5 isolates, and was

116 considered synergistic and/or fungicidal if at least one of these combinations met criteria for  
117 synergistic or fungicidal activity, respectively. At 24 hours, AMB plus RIF and AMB plus MIN  
118 were synergistic against all 5 strains, while at 48 hours, AMB plus RIF was synergistic against 4  
119 strains and AMB plus MIN against 3 strains. In combination with RIF, AMB showed fungicidal  
120 activity against 2 strains at 24 and 48 hours, and against an additional strain at 24 hours, at  
121 concentrations at which it was not fungicidal alone. In combination with MIN, AMB showed  
122 fungicidal activity against 2 strains at 24 and 48 hours at concentrations at which it was not  
123 fungicidal alone. The combination of CAS plus MIN was not synergistic or fungicidal against any  
124 strains. The synergy killing curves for this combination were notable in that CAS exhibited an  
125 inhibitory or near-inhibitory effect even at concentrations at or below the BMD MIC, yet its  
126 effect was unchanged by the addition of MIN. To further investigate this finding, single-drug  
127 killing curve studies were performed with CAS over a range of concentrations; these showed  
128 minimal effect of drug concentration on inhibition or killing, in accordance with previously  
129 reported observations (26) (Figure 2).

130

## 131 DISCUSSION

132 We identified three combinations of antibacterial and antifungal drugs (AMB plus RIF,  
133 AMB plus MIN, and CAS plus MIN) that demonstrated synergistic activity by checkerboard array  
134 against  $\geq 90\%$  of *C. auris* strains evaluated; the two AMB-containing combinations were also  
135 synergistic by time-kill synergy testing at one or more concentration combinations against the  
136 strains evaluated. We thereby demonstrate synergistic activity between antibacterial and  
137 antifungal agents against the emerging and highly multidrug-resistant pathogen *C. auris*.

138           We hypothesize that the mechanism of synergy for these combinations involves  
139 impairment in cell wall or membrane integrity by the antifungal drug, permitting entry of an  
140 antibacterial agent that would otherwise be unable to access the intracellular compartment of  
141 a fungal cell. Echinocandins such as CAS act by inhibiting  $\beta$ -(1,3)-glucan synthase, thus impeding  
142 cell wall synthesis and impairing cell wall integrity, resulting in increased vulnerability of the cell  
143 to osmotic pressure (27). AMB has traditionally been understood to act by forming ion channels  
144 in the lipid bilayer of the fungal cell membrane, thus permeabilizing the cell and ultimately  
145 causing cell death (28, 29). However, recent work suggests that large aggregates of AMB, which  
146 assemble outside the membrane and act as “sterol sponges” that kill cells by extracting  
147 ergosterol from the lipid bilayer, may play a more important role in cell death than do the ion  
148 channels (30). It is conceivable that at the subinhibitory concentrations at which it  
149 demonstrates synergy with MIN and RIF, AMB could be exerting ion channel permeabilizing  
150 activity without aggregate-based cytotoxicity, allowing entry of the antibacterial drugs through  
151 the channels.

152           Our hypothesis is supported by prior observations that tetracycline inhibits protein  
153 synthesis in isolated yeast ribosomes (31) and that RIF appears to inhibit RNA polymerase in  
154 yeast (17). These drugs, therefore, may have targets in yeast cells analogous to those in  
155 bacteria but accessible in yeast only in the setting of disruption of cell membrane or cell wall  
156 integrity. A similar phenomenon is well established in bacteria, whereby drugs that are unable  
157 to bypass the defenses of the Gram-negative outer membrane under normal circumstances  
158 demonstrate activity in the presence of low levels of membrane-permeabilizing agents such as  
159 polymyxins (32, 33).



160 We used two separate synergy testing methods in an effort to increase the robustness  
161 of our results, and found that while two combinations demonstrated consistent synergy using  
162 both methods, a third was synergistic only by the checkerboard array method and not the time-  
163 kill method. It is possible that this finding reflects a limitation of the synergistic activity of this  
164 combination (CAS plus MIN). Alternatively, the finding may reflect the limitations of the time-  
165 kill testing method for evaluation of CAS activity, as our single-drug CAS killing curves did not  
166 demonstrate concentration-dependent inhibitory or fungicidal effects, a finding that has been  
167 previously observed with this drug in *C. auris* (26).

168 In this study we also demonstrated the utility of an automated inkjet printer-assisted  
169 digital dispensing method for MIC and checkerboard array synergy testing in yeast. Manual  
170 synergy testing is an error-prone and time-consuming process, and automation allows for  
171 significantly higher throughput of the technique, thereby facilitating more rapid investigation of  
172 novel combinations. This use of the DDM for MIC and synergy testing of bacteria, first described  
173 in our laboratory (34, 35), has been adopted by the United States Centers for Disease Control  
174 and Prevention to test drug combinations against multidrug-resistant bacterial pathogens (36)  
175 and has the potential for similar use for fungal pathogens such as *C. auris*.

176 *In vitro* synergy testing has certain intrinsic limitations and is not always a direct  
177 indicator of *in vivo* efficacy (37). However, identification of combinations with *in vitro* activity  
178 provides preliminary data to suggest regimens that may ultimately prove to be of therapeutic  
179 benefit. Given the paucity of new antifungal drugs in the development pipeline, regimens that  
180 involve readily available drugs for which extensive pharmacokinetic and safety data already  
181 exist offer the potential for expedited clinical evaluation and implementation. The

182 concentrations of antifungal drugs active in the combinations identified were very low and  
183 easily clinically achievable. Although no interpretive criteria (i.e. susceptibility breakpoints) exist  
184 for MIN or RIF for yeast, the concentration of MIN in synergistic combinations was  $\leq 8 \mu\text{g/mL}$  in  
185 more than half the instances of synergy we identified; such concentrations would be  
186 considered susceptible ( $4 \mu\text{g/mL}$ ) or intermediate ( $8 \mu\text{g/mL}$ ) for Gram-positive bacterial  
187 pathogens such as *Staphylococcus aureus* and *Enterococcus* spp. by CLSI (38), suggesting  
188 plausible clinical applicability. In topical or local applications (e.g. ophthalmic drops or catheter  
189 coating), antibiotics can often be used at concentrations greater than can be safely achieved  
190 systemically (39); the combinations we identified could thus also have potential use in these  
191 scenarios.

192         The need for new therapeutic options for *C. auris* has been underscored since the  
193 advent of the COVID-19 pandemic, with recent reports from India (4), Colombia (5), and the  
194 United States (6) describing *C. auris* infection as a complication of SARS-CoV-2-related critical  
195 illness. In addition to possible direct applicability, if the combinations we evaluated act, as we  
196 predict, by allowing access of MIN and RIF to intracellular targets in yeast, this information may  
197 guide future antifungal drug development approaches. Evaluation of combinations in animal  
198 models and ultimately in clinical trials will be critical future steps in establishing clinical activity.  
199 In the absence of a predictable timeline for introduction of novel antifungal agents, repurposing  
200 existing drugs may be our best hope in identifying new treatment approaches for patients with  
201 infections caused by *C. auris* and other emerging multidrug-resistant fungal pathogens.

202

203 MATERIALS AND METHODS

204 **Fungal isolates.** Ten *C. auris* isolates were obtained from the CDC & FDA Antibiotic Resistance (AR)  
205 Isolate Bank (Atlanta, GA). *Candida parapsilosis* ATCC 22019, *Candida krusei* ATCC 6258, *Escherichia coli*  
206 ATCC 25922, and *Staphylococcus aureus* ATCC 29213 were obtained from the American Type Culture  
207 Collection (Manassas, VA). All strains were colony purified, minimally passaged, and stored at -80°C in  
208 tryptic soy broth (BD Diagnostics, Franklin Lakes, NJ) with 50% glycerol (Sigma-Aldrich, St. Louis, MO).  
209  
210 **Antimicrobial agents.** Voriconazole (VRC) was obtained from Acros Organics (Pittsburgh, PA).  
211 Caspofungin (CAS) was obtained from Carbosynth (Oakbrook Terrace, IL). Amphotericin B (AMB) was  
212 obtained from Sigma-Aldrich (St. Louis, MO). Minocycline (MIN) was obtained from Chem Impex  
213 International (Wood Dale, IL). Rifampin (RIF) was obtained from Fisher Scientific (Waltham, MA).  
214 Antimicrobial stocks were prepared in DMSO (Sigma-Aldrich), with the exception of minocycline stock  
215 used for time-kill experiments, which was prepared in water. All antimicrobials were quality control (QC)  
216 tested with *C. parapsilosis* ATCC 22019 and *C. krusei* ATCC 6258 (VRC, CAS, and AMB) or with *E. coli* ATCC  
217 25922 and *S. aureus* ATCC 29213 (MIN and RIF) and were used only if they produced an MIC result in the  
218 QC range accepted by CLSI (38, 40). After passing QC, stocks were aliquoted and stored at -80°C  
219 (antifungal drugs) or -20°C (antibacterial drugs) until use. Aliquots were discarded after a single use.  
220  
221 **Antimicrobial susceptibility testing.** Manual broth microdilution (BMD) testing of *C. auris* isolates was  
222 performed in triplicate for each drug according to CLSI guidelines (23). Strains were isolation streaked on  
223 Sabouraud dextrose agar plates (Thermo Scientific, Waltham, MA) and incubated for 24 hours at 35°C in  
224 ambient air. BMD plates were made by preparing serial 2-fold dilutions of antimicrobial agents at twice  
225 the desired final concentration in 100 µL RPMI 1640 media with L-glutamine (Cytiva, Marlborough, MA)  
226 prepared with MOPS buffer (Fisher Scientific, Waltham, MA) in clear, round-bottom, untreated 96-well  
227 plates (Evergreen Scientific, Los Angeles, CA, USA). Fungal inocula were prepared by suspending colonies

228 from the overnight plates in sterile 0.9% sodium chloride and adjusting to a 0.5 McFarland standard,  
229 diluting this suspension 1:1000 in RPMI, then adding 100  $\mu$ L of the diluted suspension to each well for a  
230 final volume of 200  $\mu$ L and cell density of 0.5-2.5  $\times 10^3$  CFU/mL. Negative (sterility) control and growth  
231 control wells were included in each row. Plates were then incubated at 35°C in ambient air. At 24 hours  
232 (all drugs) and 48 hours (VRC and AMB), plates were removed from the incubator and vortexed on a  
233 plate shaker for 4 minutes, after which OD<sub>600</sub> readings were taken with a Tecan Infinite M1000 Pro  
234 microplate reader (Tecan, Morrisville, NC) to quantify growth. OD<sub>600</sub> readings were normalized by  
235 subtracting the average reading of the negative control wells from the same plate, which contained  
236 media without yeast, then the percent inhibition for each well was calculated relative to the average of  
237 the positive growth control wells of the same isolate from the same plate. For CAS and VRC, the lowest  
238 concentration of drug that reduced growth by at least 50% was considered the MIC; for AMB the lowest  
239 concentration of drug that reduced growth by at least 90% was considered the MIC (23). If a skipped  
240 well occurred, MIC testing was repeated.

241

242 MIC testing was also performed using an automated inkjet printer-assisted digital dispensing method  
243 (DDM) adapted from a method developed in our laboratory for MIC testing of bacteria (34). Initial 0.5  
244 McFarland yeast suspensions were prepared in RPMI as described above and then diluted 1:2000 in  
245 RPMI. The same final volume and cell density in each well was achieved by adding 200  $\mu$ L of this diluted  
246 suspension to each well in a 96-well plate. Antimicrobial drugs were then dispensed by the HP D300  
247 digital dispenser instrument (HP, Inc., Palo Alto, CA) into the yeast suspension in the wells. Incubation  
248 and growth interpretation were carried out as in the BMD method described above.

249

250 **Checkerboard array synergy testing.** The DDM method described above was used to prepare  
251 checkerboard arrays in which two drugs were each dispensed in 7-9 two-fold dilutions. Each

252 combination was tested against every *C. auris* strain, with growth determinations made after 24 hours  
253 of incubation. Growth inhibition was determined as described above. For combinations in which both  
254 drugs use 90% inhibition for MIC determination (AMB plus MIN, AMB plus RIF, and MIN plus RIF),  
255 combination wells were considered inhibitory when growth was inhibited by 90% relative to growth  
256 control wells; for all other combinations, combination wells were considered inhibitory when growth  
257 was inhibited by at least 50% relative to growth control wells. For each combination well in which  
258 growth was inhibited, the fractional inhibitory concentration (FIC) for each drug was calculated by  
259 dividing the concentration of the drug in that well by the MIC of that drug alone. The FIC index (FIC<sub>i</sub>) for  
260 the well was then calculated by summing the FICs of the two drugs in the well; in cases where the MIC of  
261 a drug was off-scale, the highest concentration tested was assigned an FIC of 0.5 to permit calculation of  
262 the FIC<sub>i</sub>. A combination was considered synergistic against an isolate if it had a minimum FIC<sub>i</sub> (FIC<sub>i-MIN</sub>) of  
263  $\leq 0.5$ , antagonistic if it had an FIC<sub>i-MIN</sub> of  $>4.0$ , and indifferent if it had an intermediate FIC<sub>i-MIN</sub> value (41).

264

#### 265 **Time-kill synergy testing.**

266 Antimicrobial stocks were diluted in 9.5 mL of RPMI 1640 in 25- by 150-mm glass round-bottom tubes to  
267 the appropriate starting concentrations, which were selected based on checkerboard array synergy  
268 results. For the AMB-containing combinations, two different AMB concentrations (chosen based on  
269 checkerboard array results) were tested in combination with a fixed concentration of MIN or RIF. For the  
270 combination of CAS plus MIN, two concentrations of MIN were tested with a fixed concentration of CAS  
271 because of the observation that the effect of CAS on yeast growth was minimally affected by CAS  
272 concentration (see results and discussion). Negative (sterility) control and positive growth control tubes  
273 containing no antimicrobials were also prepared. A 1.0 McFarland suspension of yeast cells from an  
274 overnight plate was prepared in 0.9% sodium chloride and 0.5 mL of this suspension was added to each  
275 tube for a final starting concentration of  $1\text{-}5 \times 10^5$  CFU/mL. Cultures were incubated with shaking in

276 ambient air at 35°C for 48 hours. At 0, 3, 6, 24, and 48 hours, aliquots were removed from the culture  
277 tube and a 10-fold dilution series was prepared in 0.9% sodium chloride. A 10 µL drop from each dilution  
278 was plated onto Sabouraud dextrose agar and incubated overnight. The colonies within each drop were  
279 then counted; drops containing 3 to 40 colonies were considered usable and cell density was calculated  
280 from these. If more than one dilution for a given sample was usable, the cell densities of the two drops  
281 were averaged. If no drops were usable, the densities for consecutive drops above and below the usable  
282 range were averaged. The lower limit of detection with this method is 300 CFU/mL. A combination was  
283 considered synergistic if it resulted in a  $\geq 2 \log_{10}$  reduction in CFU/mL compared to the most active agent  
284 alone and fungicidal if it resulted in a  $\geq 3 \log_{10}$  CFU/mL reduction compared to starting inoculum. Synergy  
285 and fungicidal activity were evaluated at 24 and 48 hours.

286

287 **Data analysis.** Data output from plate readings was visualized using Microsoft Excel (Microsoft  
288 Corporation, Redmond, WA). A custom Python script was used to normalize MIC and synergy results and  
289 to calculate and visualize growth inhibition.

290

## 291 ACKNOWLEDGEMENTS

292 T.B.-K. was supported by a Eunice Kennedy Shriver National Institute of Child Health and Human  
293 Development pediatric infectious diseases research training grant (T32HD055148), a National Institute  
294 of Allergy and Infectious Diseases (NIAID) training grant (T32AI007061), a Boston Children's Hospital  
295 Office of Faculty Development Faculty Career Development fellowship, an Academy of Clinical  
296 Laboratory Physicians and Scientists (ACLPS) Paul E. Strandjord Young Investigator Grant, and a NIAID  
297 career development award (1K08AI132716). The HP D300 digital dispenser and TECAN M1000 used in  
298 experiments were provided by TECAN (Morrisville, NC). TECAN had no role in study design, data  
299 collection/interpretation, manuscript preparation, or decision to publish.

300 REFERENCES

- 301 1. Satoh K, Makimura K, Hasumi Y, Nishiyama Y, Uchida K, Yamaguchi H. 2009. *Candida auris* sp.  
302 nov., a novel ascomycetous yeast isolated from the external ear canal of an inpatient in a  
303 Japanese hospital. *Microbiol Immunol* 53:41–44.
- 304 2. CDC. 2019. Antibiotic resistance threats in the United States. U.S. Department of Health and  
305 Human Services, CDC, Atlanta, GA.
- 306 3. Chow NA, De Groot T, Badali H, Abastabar M, Chiller TM, Meis JF. 2019. Potential fifth clade of  
307 *Candida auris*, Iran, 2018. *Emerg Infect Dis* 25:1780–1781.
- 308 4. Chowdhary A, Tarai B, Singh A, Sharma A. 2020. Multidrug-resistant *Candida auris* infections in  
309 critically ill Coronavirus disease patients, India, April–July 2020. *Emerg Infect Dis* 26:2694–2696.
- 310 5. Rodriguez JY, Le Pape P, Lopez O, Esquea K, Labiosa AL, Alvarez-Moreno C. 2020. *Candida auris* :  
311 A Latent Threat to Critically Ill Patients With Coronavirus Disease 2019. *Clin Infect Dis*.
- 312 6. Prestel C, Anderson E, Forsberg K, Lyman M, de Perio MA, Kuhar D, Edwards K, Rivera M, Shugart  
313 A, Walters M, Dotson NQ. 2021. *Candida auris* Outbreak in a COVID-19 Specialty Care Unit —  
314 Florida, July–August 2020. *MMWR Morb Mortal Wkly Rep* 70:56–57.
- 315 7. Lockhart SR, Etienne KA, Vallabhaneni S, Farooqi J, Chowdhary A, Govender NP, Colombo AL,  
316 Calvo B, Cuomo CA, Desjardins CA, Berkow EL, Castanheira M, Magobo RE, Jabeen K, Asghar RJ,  
317 Meis JF, Jackson B, Chiller T, Litvintseva AP. 2017. Simultaneous emergence of multidrug-  
318 resistant *Candida auris* on 3 continents confirmed by whole-genome sequencing and  
319 epidemiological analyses. *Clin Infect Dis* 64:134–140.
- 320 8. Spivak ES, Hanson KE. 2018. *Candida auris*: an Emerging Fungal Pathogen. *J Clin Microbiol*  
321 56:e01588-17.
- 322 9. Jeffery-Smith A, Taori SK, Schelenz S, Jeffery K, Johnson EM, Borman A, Manuel R, Brown CS.  
323 2018. *Candida auris*: A review of the literature. *Clin Microbiol Rev* 31:e00029-17.

- 324 10. Robbins N, Wright GD, Cowen LE. 2016. Antifungal drugs: the current armamentarium and  
325 development of new agents. *Microbiol Spectr* 4:doi: 10.1128/microbiolspec.FUNK-0002-2016.
- 326 11. Arendrup MC, Prakash A, Meletiadis J, Sharma C, Chowdhary A. 2017. Comparison of EUCAST and  
327 CLSI reference microdilution mics of eight antifungal compounds for candida auris and associated  
328 tentative epidemiological cutoff values. *Antimicrob Agents Chemother* 61:e00485-17.
- 329 12. Ostrowsky B, Greenko J, Adams E, Quinn M, O'Brien B, Chaturvedi V, Berkow E, Vallabhaneni S,  
330 Forsberg K, Chaturvedi S, Lutterloh E, Blog D, Bucher C, Denis RJ, Erazo R, Fernandez R, Southwick  
331 K, Zhu YC. 2020. Candida auris Isolates Resistant to Three Classes of Antifungal Medications —  
332 New York, 2019. *MMWR Morb Mortal Wkly Rep* 69:6–9.
- 333 13. Arendrup MC, Jørgensen KM, Hare RK, Chowdhary A. 2020. In Vitro Activity of Ibrexafungerp  
334 (SCY-078) against Candida auris Isolates as Determined by EUCAST Methodology and Comparison  
335 with Activity against *C. albicans* and *C. glabrata* and with the Activities of Six Comparator Agents.  
336 *Antimicrob Agents Chemother* 64:e02136-19.
- 337 14. Ghannoum M, Isham N, Angulo D, Borroto-Esoda K, Barat S, Long L. 2020. Efficacy of  
338 ibrexafungerp (SCY-078) against candida auris in an in vivo guinea pig cutaneous infection model.  
339 *Antimicrob Agents Chemother* 64:e00854-20.
- 340 15. Day JN, Chau TTH, Wolbers M, Mai PP, Dung NT, Mai NH, Phu NH, Nghia HD, Phong ND, Thai CQ,  
341 Thai LH, Chuong L V., Sinh DX, Duong VA, Hoang TN, Diep PT, Campbell JI, Sieu TPM, Baker SG,  
342 Chau NVV, Hien TT, Lalloo DG, Farrar JJ. 2013. Combination Antifungal Therapy for Cryptococcal  
343 Meningitis. *N Engl J Med* 368:1291–1302.
- 344 16. Cortez KJ, Roilides E, Quiroz-Telles F, Meletiadis J, Antachopoulos C, Knudsen T, Buchanan W,  
345 Milanovich J, Sutton DA, Fothergill A, Rinaldi MG, Shea YR, Zaoutis T, Kottitil S, Walsh TJ. 2008.  
346 Infections caused by *Scedosporium* spp. *Clin Microbiol Rev* 21:157–97.
- 347 17. Medoff G, Kobayashi GS, Kwan CN, Schlessinger D, Venkov P. 1972. Potentiation of rifampicin



- 348 and 5-fluorocytosine as antifungal antibiotics by amphotericin B (yeast-membrane permeability-  
349 ribosomal RNA-eukaryotic cell-synergism). *Proc Natl Acad Sci U S A* 69:196–199.
- 350 18. Kwan CN, Medoff G, Kobayashi GS, Schlessinger D, Raskas HJ. 1972. Potentiation of the antifungal  
351 effects of antibiotics by amphotericin B. *Antimicrob Agents Chemother* 2:61–65.
- 352 19. Beggs WH, Sarosi GA, Walker MI. 1976. Synergistic action of amphotericin B and rifampin against  
353 *Candida* species. *J Infect Dis* 133:206–9.
- 354 20. Lew M, Beckett K, Levin M. 1978. Combined Activity of Minocycline and Amphotericin B In Vitro  
355 Against Medically Important Yeasts. *Antimicrob Agents Chemother* 14:465–469.
- 356 21. Shi W, Chen Z, Chen X, Cao L, Liu P, Sun S. 2010. The combination of minocycline and fluconazole  
357 causes synergistic growth inhibition against *Candida albicans*: An in vitro interaction of antifungal  
358 and antibacterial agents. *FEMS Yeast Res* 10:885–93.
- 359 22. Fiori A, Van Dijck P. 2012. Potent synergistic effect of doxycycline with fluconazole against  
360 *Candida albicans* is mediated by interference with iron homeostasis. *Antimicrob Agents*  
361 *Chemother*.
- 362 23. CLSI. 2008. Reference method for broth dilution antifungal susceptibility testing of yeasts:  
363 approved standard - third edition. CLSI document M27-A3. Clinical and Laboratory Standards  
364 Institute, 3rd ed. Wayne, PA.
- 365 24. Pfaller MA, Diekema DJ. 2012. Progress in antifungal susceptibility testing of *Candida* spp. by use  
366 of Clinical and Laboratory Standards Institute broth microdilution methods, 2010 to 2012. *J Clin*  
367 *Microbiol* 50:2846–56.
- 368 25. Pfaller MA, Boyken LB, Hollis RJ, Kroeger J, Messer SA, Tendolkar S, Diekema DJ. 2008. Validation  
369 of 24-hour fluconazole MIC readings versus the CLSI 48-hour broth microdilution reference  
370 method: Results from a global *Candida* antifungal surveillance program. *J Clin Microbiol* 46:3585–  
371 90.

- 372 26. Dudiuk C, Berrio I, Leonardelli F, Morales-Lopez S, Theill L, Macedo D, Yesid-Rodriguez J, Salcedo  
373 S, Marin A, Gamarra S, Garcia-Effron G. 2019. Antifungal activity and killing kinetics of  
374 anidulafungin, caspofungin and amphotericin B against *Candida auris*. *J Antimicrob Chemother*  
375 74:2295–2302.
- 376 27. Wagner C, Graninger W, Presterl E, Joukhadar C. 2006. The echinocandins: Comparison of their  
377 pharmacokinetics, pharmacodynamics and clinical applications. *Pharmacology* 78:161–77.
- 378 28. Ermishkin LN, Kasumov KM, Potzeluyev VM. 1976. Single ionic channels induced in lipid bilayers  
379 by polyene antibiotics amphotericin B and nystatine. *Nature* 262:698–9.
- 380 29. Kinsky SC. 1970. Antibiotic interaction with model membranes. *Annu Rev Pharmacol* 10:119–42.
- 381 30. Anderson TM, Clay MC, Cioffi AG, Diaz KA, Hisao GS, Tuttle MD, Nieuwkoop AJ, Comellas G,  
382 Maryum N, Wang S, Uno BE, Wildeman EL, Gonen T, Rienstra CM, Burke MD. 2014. Amphotericin  
383 forms an extramembranous and fungicidal sterol sponge. *Nat Chem Biol* 10:400–6.
- 384 31. Battaner E, Vazquez D. 1971. Inhibitors of protein synthesis by ribosomes of the 80-S type.  
385 *Biochim Biophys Acta* 254:316–330.
- 386 32. Vaara M. 1992. Agents that increase the permeability of the outer membrane. *Microbiol Rev*  
387 56:395–411.
- 388 33. Brennan-Krohn T, Pironti A, Kirby JE. 2018. Synergistic Activity of Colistin-Containing  
389 Combinations against Colistin-Resistant Enterobacteriaceae. *Antimicrob Agents Chemother*  
390 62:e00873-18.
- 391 34. Smith KP, Kirby JE. 2016. Verification of an automated, digital dispensing platform for at-will  
392 broth microdilution-based antimicrobial susceptibility testing. *J Clin Microbiol* 54:2288–2293.
- 393 35. Brennan-Krohn T, Truelson K, Smith KP, Kirby JE. 2017. Screening for Synergistic Activity of  
394 Antimicrobial Combinations Against Carbapenem-Resistant Enterobacteriaceae Using Inkjet  
395 Printer-Based Technology. *J Antimicrob Chemother* 72:2775–2781.

- 396 36. Ransom E, Bhatnagar A, Patel JB, Machado MJ, Boyd S, Reese N, Lutgring JD, Lonsway D,  
397 Anderson K, Brown AC, Elkins CA, Kamile Rasheed J, Karlsson M. 2020. Validation of aztreonam-  
398 avibactam susceptibility testing using digitally dispensed custom panels. *J Clin Microbiol*.
- 399 37. Ernst JD, Rusnak M, Sande MA. 1983. Combination antifungal chemotherapy for experimental  
400 disseminated candidiasis: lack of correlation between in vitro and in vivo observations with  
401 amphotericin B and rifampin. *Rev Infect Dis* 5:S626-30.
- 402 38. CLSI. 2020. Performance Standards for Antimicrobial Susceptibility Testing. CLSI M100 ED30:2020.  
403 Clinical and Laboratory Standards Institute, Wayne, PA.
- 404 39. Williamson DA, Carter GP, Howden BP. 2017. Current and emerging topical antibacterials and  
405 antiseptics: Agents, action, and resistance patterns. *Clin Microbiol Rev* 30:827–860.
- 406 40. CLSI. 2017. Performance Standards for Antifungal Susceptibility Testing of Yeasts 1st ed. CLSI  
407 supplement M60. Clinical and Laboratory Standards Institute, Wayne, PA.
- 408 41. Odds FC. 2003. Synergy, antagonism, and what the checkerboard puts between them. *J*  
409 *Antimicrob Chemother* 52:1–1.
- 410
- 411

412 FIGURE LEGENDS

413 FIG 1 Time-kill synergy graphs

414 Strain numbers refer to CDC & FDA Antibiotic Resistance Isolate Bank designations. Dashed line indicates  
415 assay lower limit of detection. Filled (red) symbols indicate synergistic concentration combinations.

416

417 FIG 2 Caspofungin killing curves

418 Strain numbers refer to CDC & FDA Antibiotic Resistance Isolate Bank designations. The broth  
419 microdilution MIC of caspofungin is 0.5 µg/mL for strain 0388 and 0.13 µg/mL for strain 0389.

420

421 TABLES

**TABLE 1** Modal broth microdilution MICs ( $\mu\text{g/mL}$ ) at 24 and 48 hours

| Strain<br>(AR Bank Number) | AMB<br>24 hr | AMB<br>48 hr | VRC<br>24 hr | VRC<br>48 hr | CAS<br>24 hr | MIN<br>24 hr | RIF<br>24 hr |
|----------------------------|--------------|--------------|--------------|--------------|--------------|--------------|--------------|
| 0381                       | 0.5          | 1            | $\leq 0.016$ | 0.031        | 0.063        | >64          | >128         |
| 0382                       | 0.5          | 1            | 0.031        | >8           | 0.125        | >64          | >128         |
| 0383                       | 1            | 1            | 1            | 2            | 0.125        | >64          | >128         |
| 0384                       | 1            | 1            | 0.5          | N/A          | 0.125        | >64          | >128         |
| 0385                       | 1            | 1            | 8            | >8           | 0.125        | >64          | >128         |
| 0386                       | 1            | 1            | 4            | >8           | 0.125        | >64          | >128         |
| 0387                       | 1            | 1            | 0.063        | >8           | 0.125        | >64          | >128         |
| 0388                       | 2            | 2            | 1            | 4            | 0.5          | >64          | >128         |
| 0389                       | 2            | 2            | 4            | 8            | 0.125        | >64          | >128         |
| 0390                       | 1            | 2            | 1            | 2            | 0.125        | >64          | >128         |

AR Bank: CDC & FDA Antibiotic Resistance Isolate Bank; AMB, amphotericin B; CAS, caspofungin; VRC, voriconazole; MIN, minocycline; RIF, rifampin. N/A: Modal MIC could not be determined as MICs were 0.125, 2, and 8  $\mu\text{g/mL}$

422

423

424

425

426

**TABLE 2** Essential agreement between on-scale DDM MIC results and modal BMD MIC

| Drug and time | DDM MIC results within $\pm 1$ two-fold | DDM MIC results within $\pm 2$ two-fold |
|---------------|-----------------------------------------|-----------------------------------------|
|               | dilution of modal MIC ( <i>n</i> , %)   | dilutions of modal MIC ( <i>n</i> , %)  |
| AMB, 24 hr    | 50/50 (100.0)                           | 50/50 (100.0)                           |
| AMB, 48 hr    | 49/49 (100.0)                           | 49/49 (100.0)                           |
| CAS, 24 hr    | 40/49 (81.6)                            | 48/49 (98.0)                            |
| VRC, 24 hr    | 35/37 (94.6)                            | 37/37 (100.0)                           |
| VRC, 48 hr    | 21/21 (100.0)                           | 21/21 (100.0)                           |
| MIN, 24 hr    | N/A                                     | N/A                                     |
| RIF, 24 hr    | N/A                                     | N/A                                     |
| Total         | 195/206 (94.7)                          | 205/206 (99.5)                          |

AMB, amphotericin B; CAS, caspofungin; VRC, voriconazole; MIN, minocycline; RIF, rifampin.

MIC results were not used when >1 skipped well occurred (*n* = 6), when modal BMD MIC or DDM result was off-scale (*n* = 33), or when there was no modal BMD MIC (*n* = 5).

N/A: Essential agreement could not be calculated due to off-scale high modal BMD MICs; all DDM results were also off-scale high for these drugs.

427

428

429

430

431

432

**TABLE 3** Checkerboard array synergy results

| Drug Combination | Percent of strains against which combination was <b>synergistic</b> ( <i>n</i> = 10) | Percent of strains against which combination was <b>antagonistic</b> ( <i>n</i> = 10) |
|------------------|--------------------------------------------------------------------------------------|---------------------------------------------------------------------------------------|
| AMB + MIN        | 100%                                                                                 | 0%                                                                                    |
| CAS + MIN        | 100%                                                                                 | 0%                                                                                    |
| AMB + RIF        | 90%                                                                                  | 0%                                                                                    |
| MIN + VRC        | 20%                                                                                  | 0%                                                                                    |
| CAS + VRC        | 10%                                                                                  | 0%                                                                                    |
| MIN + RIF        | 0%                                                                                   | 0%                                                                                    |
| AMB + CAS        | 0%                                                                                   | 0%                                                                                    |
| AMB + VRC        | 0%                                                                                   | 20%                                                                                   |
| CAS + RIF        | 0%                                                                                   | 20%                                                                                   |
| RIF + VRC        | 0%                                                                                   | 20%                                                                                   |

AMB, amphotericin B; CAS, caspofungin; VRC, voriconazole; MIN, minocycline; RIF, rifampin.

433

434

435

436

437

438

439

440

**TABLE 4** Time-kill results

| Strain<br>(AR Bank<br>Number) | Drug concentrations<br>( $\mu\text{g}/\text{mL}$ ) | Concentration difference of cells treated<br>with combination vs most active single agent<br>( $\log_{10}$ CFU/mL) |          | Concentration difference at end vs start of<br>cells treated with combination<br>( $\log_{10}$ CFU/mL) |          |
|-------------------------------|----------------------------------------------------|--------------------------------------------------------------------------------------------------------------------|----------|--------------------------------------------------------------------------------------------------------|----------|
|                               |                                                    | Shaded cells indicate <i>synergy</i>                                                                               |          | Shaded cells indicate <i>fungicidal activity</i>                                                       |          |
|                               |                                                    | 24 hours                                                                                                           | 48 hours | 24 hours                                                                                               | 48 hours |
|                               |                                                    |                                                                                                                    |          |                                                                                                        |          |
| 0381                          | AMB 0.125 + RIF 4                                  | -4.14                                                                                                              | -2.17    | -2.94                                                                                                  | -0.61    |
|                               | AMB 0.25 + RIF 4                                   | -2.03                                                                                                              | -4.30    | -3.12                                                                                                  | -3.12    |
| 0382                          | AMB 0.25 + RIF 4                                   | -2.37                                                                                                              | -4.78    | -3.21                                                                                                  | -3.21    |
|                               | AMB 0.5 + RIF 4                                    | 0.00                                                                                                               | -2.85    | -2.70                                                                                                  | -2.70    |
| 0383                          | AMB 0.125 + RIF 8                                  | -1.80                                                                                                              | -0.50    | 0.44                                                                                                   | 1.74     |
|                               | AMB 0.25 + RIF 8                                   | -3.98                                                                                                              | -3.83    | -2.39                                                                                                  | -1.99    |
| 0388                          | AMB 0.25 + RIF 16                                  | -0.40                                                                                                              | 0.07     | 1.57                                                                                                   | 1.91     |
|                               | AMB 0.5 + RIF 16                                   | -4.82                                                                                                              | -0.82    | -2.78                                                                                                  | 1.05     |
| 0389                          | AMB 0.5 + RIF 16                                   | -3.04                                                                                                              | -0.80    | -1.38                                                                                                  | 1.00     |
|                               | AMB 1 + RIF 16                                     | -2.43                                                                                                              | -1.51    | -3.52                                                                                                  | -0.30    |
| 0381                          | AMB 0.125 + MIN 8                                  | -2.30                                                                                                              | -0.60    | -1.15                                                                                                  | 0.95     |
|                               | AMB 0.25 + MIN 8                                   | -2.08                                                                                                              | -4.78    | -3.19                                                                                                  | -3.19    |
| 0382                          | AMB 0.125 + MIN 8                                  | -2.34                                                                                                              | -0.75    | -0.80                                                                                                  | 1.41     |
|                               | AMB 0.25 + MIN 8                                   | -1.30                                                                                                              | -2.76    | -1.64                                                                                                  | -1.16    |
| 0383                          | AMB 0.125 + MIN 8                                  | -2.02                                                                                                              | -0.01    | 0.13                                                                                                   | 2.02     |
|                               | AMB 0.25 + MIN 8                                   | -3.12                                                                                                              | -2.34    | -1.30                                                                                                  | -0.60    |
| 0388                          | AMB 0.5 + MIN 8                                    | -2.37                                                                                                              | -0.06    | -0.60                                                                                                  | 1.74     |



|      |                    |       |       |       |       |
|------|--------------------|-------|-------|-------|-------|
|      | AMB 1 + MIN 8      | 0.62  | -1.30 | -0.64 | -0.43 |
| 0389 | AMB 0.5 + MIN 16   | -0.53 | 0.11  | -0.96 | 1.77  |
|      | AMB 1 + MIN 16     | -3.48 | -4.99 | -3.30 | -3.30 |
| 0381 | CAS 0.031 + MIN 8  | -0.34 | -0.34 | -0.02 | -0.18 |
|      | CAS 0.031 + MIN 16 | -0.46 | 0.00  | -2.46 | -2.00 |
| 0382 | CAS 0.125 + MIN 8  | 1.07  | 0.84  | -0.27 | -0.36 |
|      | CAS 0.125 + MIN 16 | 1.02  | 0.96  | -1.24 | -1.78 |
| 0383 | CAS 0.063 + MIN 4  | 0.65  | 1.26  | 0.20  | 0.34  |
|      | CAS 0.063 + MIN 8  | 0.63  | 1.00  | -1.81 | -1.57 |
| 0388 | CAS 0.125 + MIN 8  | 0.35  | 0.85  | -0.18 | 0.44  |
|      | CAS 0.125 + MIN 16 | 0.27  | 0.39  | -1.66 | -1.55 |
| 0389 | CAS 0.25 + MIN 1   | 0.77  | 0.65  | 0.37  | 0.20  |
|      | CAS 0.25 + MIN 2   | 0.38  | 0.78  | -1.72 | -1.46 |

AR Bank: CDC & FDA Antibiotic Resistance Isolate Bank; AMB, amphotericin B; CAS, caspofungin; MIN, minocycline;

RIF, rifampin.

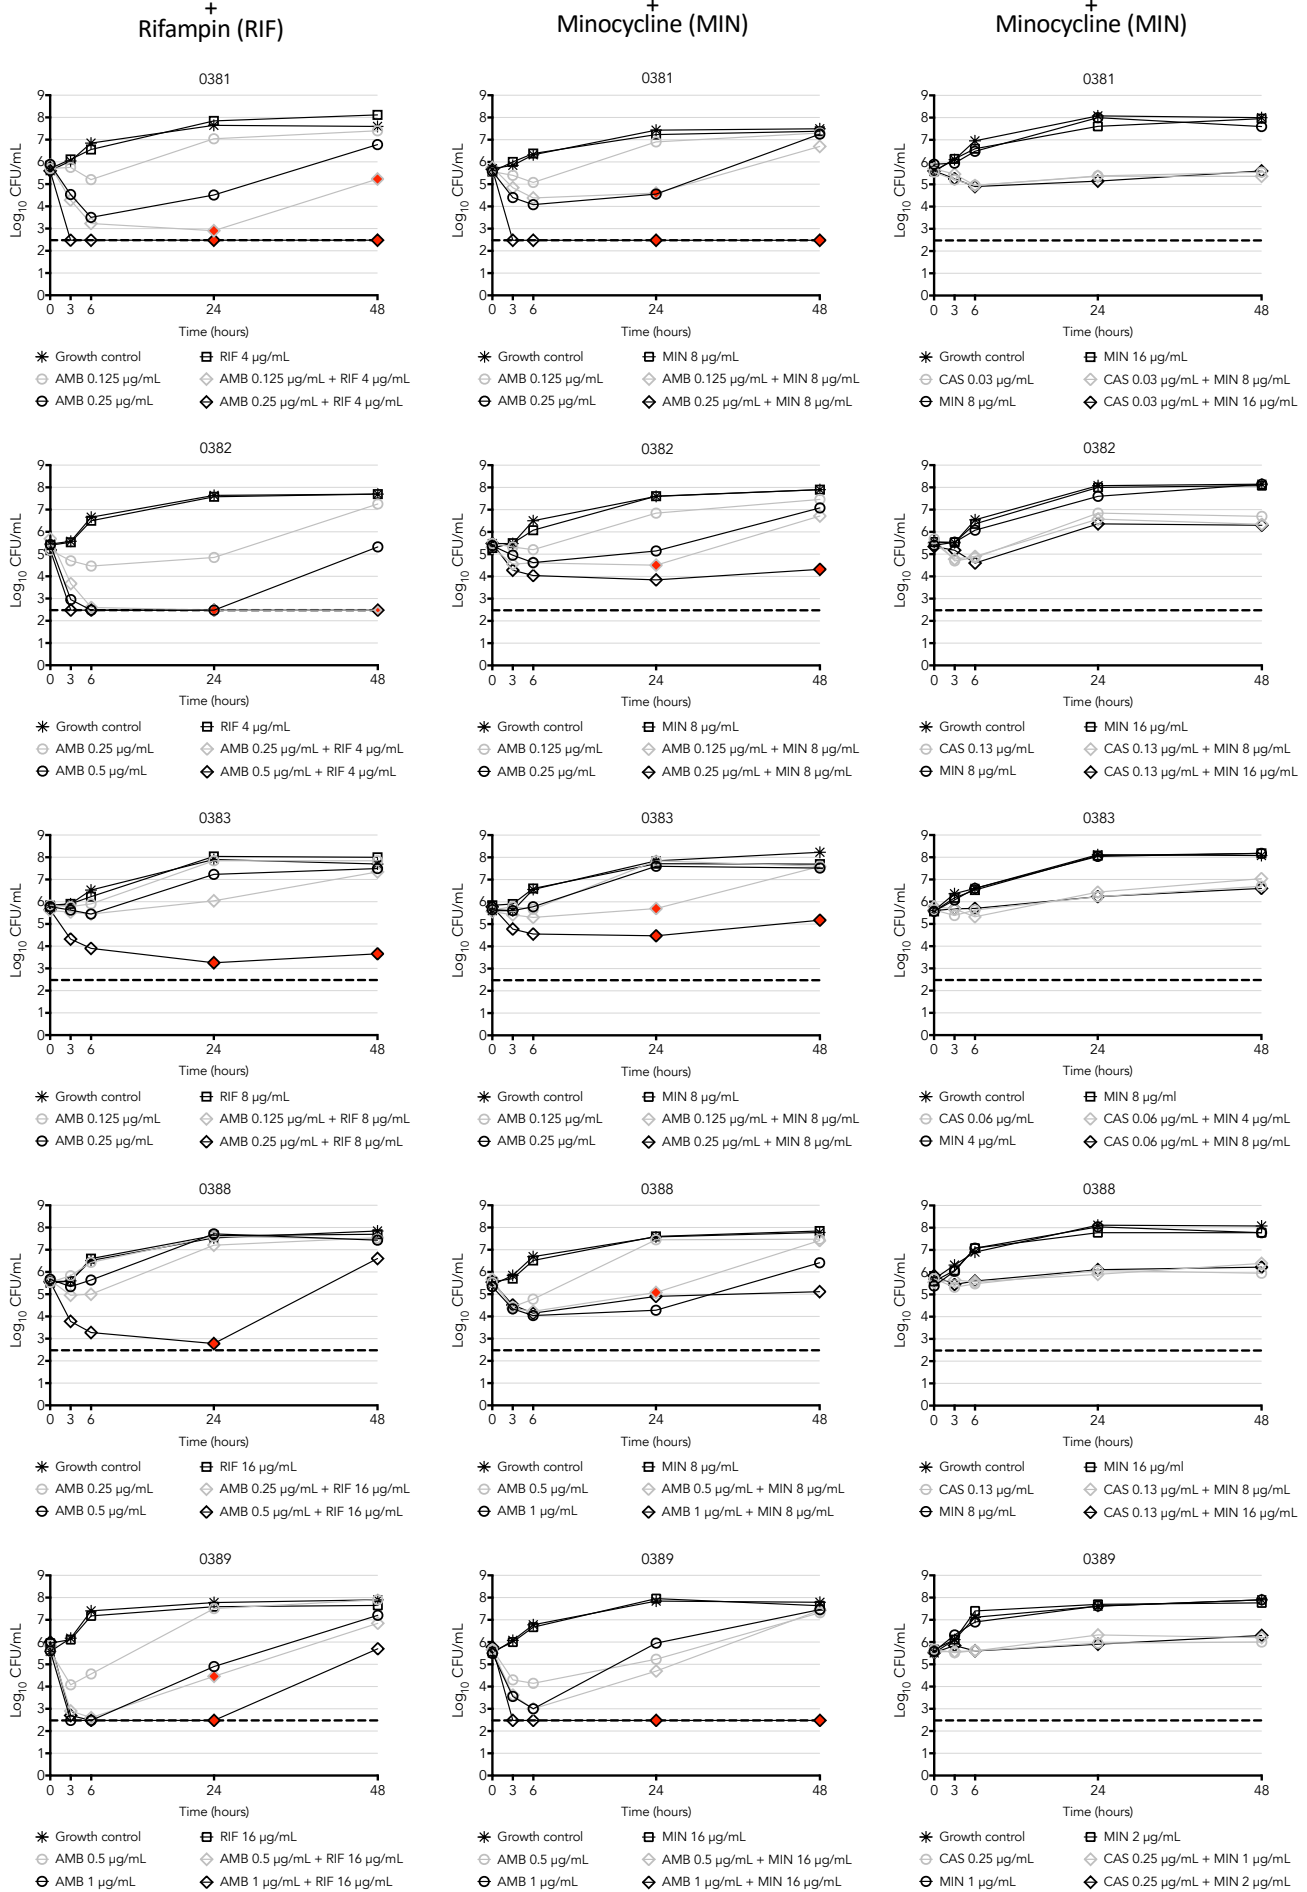

**FIGURE 1** Time-kill synergy graphs

Strain numbers refer to CDC & FDA Antibiotic Resistance Isolate Bank designations. Dashed line indicates assay lower limit of detection. Filled (red) symbols indicate synergistic concentration combinations.

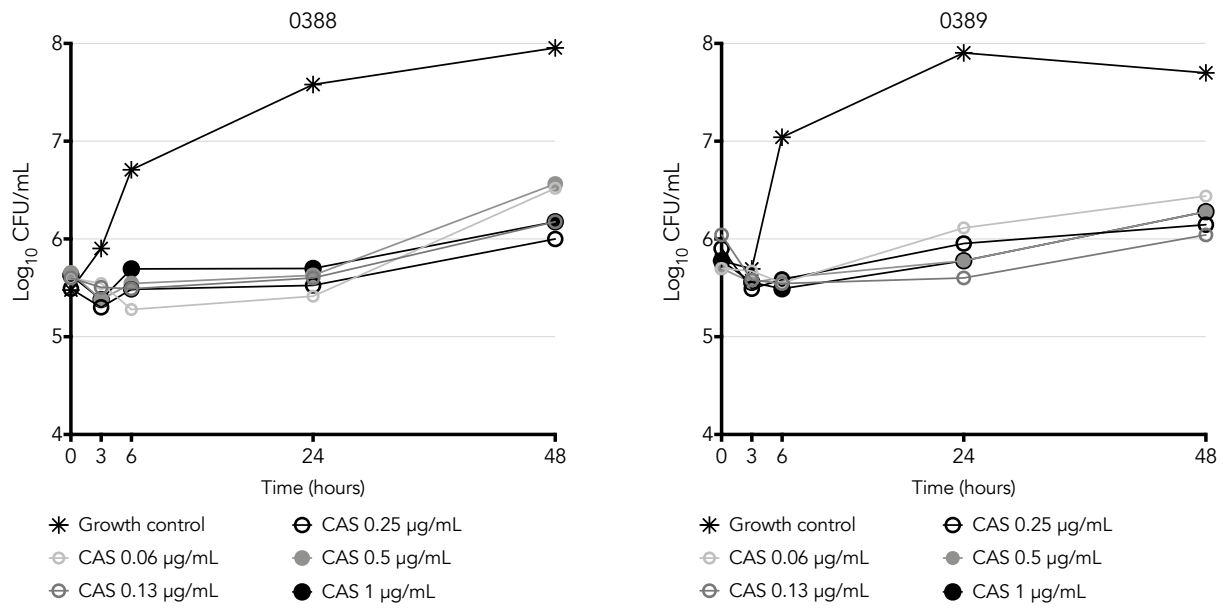

**FIGURE 2** Caspofungin killing curves

Strain numbers refer to CDC & FDA Antibiotic Resistance Isolate Bank designations. The broth microdilution MIC of caspofungin is 0.5 µg/mL for strain 0388 and 0.13 µg/mL for strain 0389.
